1 **uBin – a manual refining tool for metagenomic bins designed for educational**  
2 **purposes**

3  
4 Till L.V. Bornemann<sup>1</sup>, Sarah P. Esser<sup>1</sup>, Tom L. Stach<sup>1</sup>, Tim Burg<sup>2</sup>, and Alexander J. Probst<sup>1</sup>

5  
6 1: Institute for Environmental Microbiology and Biotechnology, Department of Chemistry,  
7 University Duisburg-Essen, Germany

8 2: Tim Burg, Im Acker 59, 56072 Koblenz, Germany

9  
10 To whom the correspondence should be addressed:

11 [alexander.probst@uni-due.de](mailto:alexander.probst@uni-due.de)

12  
13 **Abstract**

14  
15 Resolving bacterial and archaeal genomes from metagenomes has revolutionized our  
16 understanding of Earth's biomes, yet producing high quality genomes from assembled  
17 fragments has been an ever-standing problem. While automated binning software and their  
18 combination produce prokaryotic bins in high-throughput, their manual refinement has been  
19 slow and sometimes difficult. Here, we present uBin, a GUI-based, standalone bin refiner that  
20 runs on all major operating platforms and was specifically designed for educational purposes.  
21 When applied to the public CAMI dataset, refinement of bins was able to improve 78.9% of  
22 bins by decreasing their contamination. We also applied the bin refiner as a standalone binner  
23 to public metagenomes from the International Space Station and demonstrate the recovery of  
24 near-complete genomes, whose replication indices indicate active proliferation of microbes in  
25 Earth's lower orbit. uBin is an easy to install software for bin refinement, binning of simple  
26 metagenomes and communication of metagenomic results to other scientists and in  
27 classrooms. The software is open source and available under  
28 <https://github.com/ProbstLab/uBin>.

29  
30 **Keywords**

31 Genome-resolved metagenomics, genomics, genome curation, education, ISS, bacteria,  
32 archaea

33  
34 **The authors declare no competing interest. All data is publicly available.**

## 35 **Main Text**

36 Genome-resolved metagenomics aims at recovering genomes from shotgun sequencing data  
37 of environmental DNA. The genomes allow determination of the metabolic capacities of the  
38 individual community members and provide the basis for many downstream 'omics techniques  
39 like metatranscriptomics and metaproteomics. Results from these technologies can provide  
40 important insight into the interactions of microbes within the community and with the  
41 environment [1,2]. While long-read sequencing can nowadays produce complete genomes  
42 from environmental samples [2], the percentage of closed genomes from complex ecosystems  
43 remains, however, as low as 5.3% [3]. Consequently, genomes need to be binned from  
44 metagenomes using genome-wide shared characteristics like their similar abundance pattern  
45 and k-mer frequencies [4,5]. Many automatic and semi-automatic tools have been developed  
46 to extract genomes from metagenomes [6–10]. The quality of the resulting bins, however, can  
47 vary greatly depending on metagenome complexity, sample type or microbial community  
48 characteristics [6]. Recent studies have shown that contamination in genomes from  
49 metagenomes in public databases is a frequent occurrence [11,12] and suggested genome  
50 curation as a mandatory analysis step prior to genome submission to public databases [13].

51 While established tools exist to determine the bin quality [6,14], i.e. searching  
52 candidate genomes for ubiquitous or specific marker genes to evaluate completeness and  
53 contamination, tools to improve upon the bin quality are sparse. Some established tools are  
54 used for genome refinement [15,16] but have not been designed for educational purposes and  
55 are sometimes not open source [16]. Consequently, we developed uBin as an interactive  
56 graphical-user interface that is easy to install on Mac OS, Windows, and Ubuntu for usage in,  
57 e.g., classrooms. uBin is inspired by ggKbase [16] and enables the curation of genomes based  
58 on a combination of GC content, coverage and taxonomy and couples this to information on  
59 completeness and contamination for supervised binning. In addition, uBin can be directly used  
60 as a standalone software to bin genomes from low complexity samples.

61 We tested the performance of uBin (MacOS, 16 GB of RAM) on simulated datasets  
62 with varying complexity of the Critical Assessment of Metagenome Interpretation (CAMI)  
63 challenge. The pre-assembled CAMI scaffolds were binned using four automated binners  
64 (using tetranucleotide frequency and differential coverage) and the results were aggregated  
65 using DAS Tool [6] (see Supplementary Methods for details). The dereplicated bins were  
66 curated using uBin, and the quality of the bins before and after curation was compared to the  
67 correct assignment based on the CAMI dataset (see *Tab. S1* for F-scores of Bins pre- and  
68 post-uBin curation). uBin curated bins showed a highly significant quality improvement in  
69 medium ( $p < 10^{-4}$ ) and high complexity datasets ( $p < 10^{-5}$ ), using both paired t-test and  
70 unpaired Kruskal-Wallis tests (*Fig. 1A*). No significant difference could be detected for the low  
71 complexity dataset ( $p > 0.70 / 0.65$ ).

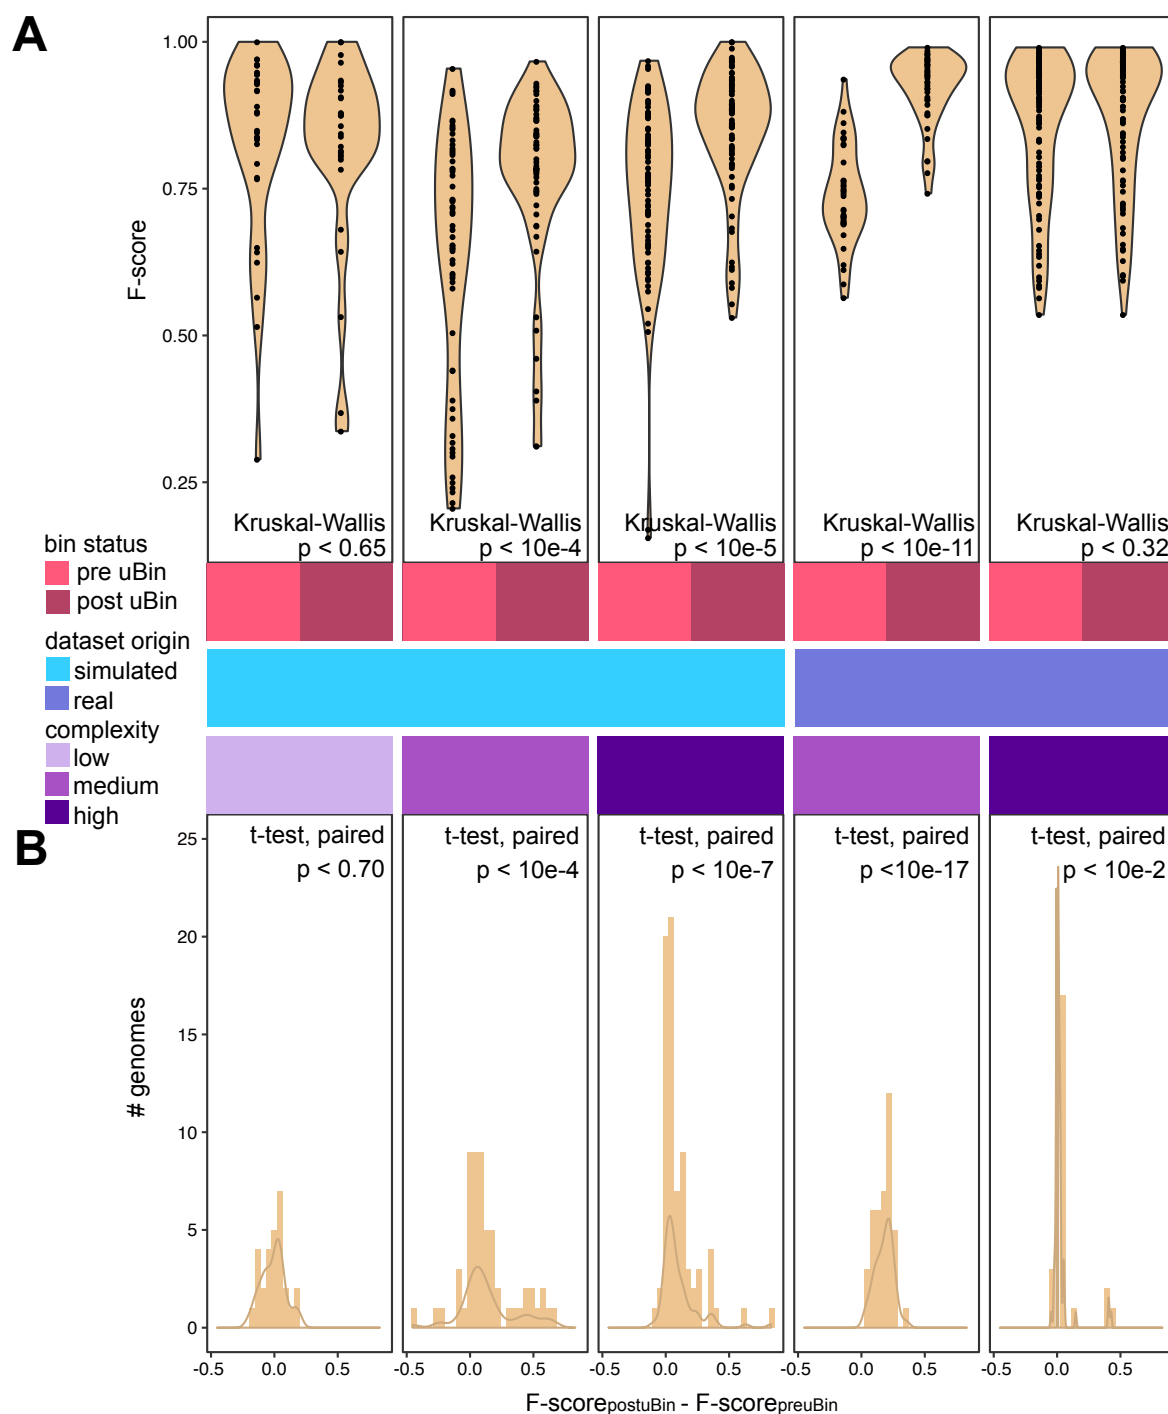

72  
 73 **Fig. 1 | Performance of uBin on simulated and real datasets with varying degrees of**  
 74 **complexity. A:** Violin plots of the F-score (mean between recall and precision) of genomes  
 75 prior to uBin curation (pre uBin) and after uBin curation (post uBin) across simulated low,  
 76 medium and high complexity datasets of the CAMI challenge as well as real world  
 77 metagenomic datasets of medium (Tomsk) and high (SulCav AS07-7) complexity. Unpaired  
 78 Kruskal-Wallis p-values are depicted. **B:** Histograms of the F-score differences for each bin  
 79 prior to and post uBin curation and their density distribution. Paired Welch t-test p-values are  
 80 shown.  
 81

82 The bin quality of the low complexity dataset was significantly higher than the bin  
 83 quality in medium (0.197 higher F-score,  $p < 10^{-6}$ ) and high complexity (0.118 higher F-score,

84  $p < 10^{-4}$ ) datasets (ANOVA coupled to TukeyHSD,  $p < 2 \times 10^{-6}$ ) after DAS Tool [6] bin  
85 aggregation. Subsequent to curation with uBin the differences between these datasets were  
86 much less pronounced (ANOVA,  $p < 0.01$ ), with only the high to medium complexity dataset  
87 showing a significant difference ( $p < 0.01$ , average 0.077 higher F-score in high complexity).  
88 We conclude that low complexity datasets bin very well with automated binners, while medium  
89 to high complexity datasets can greatly benefit from manual curation.

90 To challenge the above-mentioned conclusion, we applied uBin for the curation of bins  
91 from environmental metagenomes of medium and high complexity. As the true genome  
92 composition is unknown for these datasets, we used CheckM [14] to assess the completeness  
93 and contamination of constructed genomic bins. CheckM [14] is an independent metric  
94 compared to the marker sets used within DAS Tool [6] and uBin (see *Tab. S1* for F-scores of  
95 bins pre- and post-curation). We detected a significant improvement in genome quality when  
96 using uBin curation and directly comparing the bins in paired tests ( $p$ -values are provided in  
97 *Fig. 1B*).

98 Following the conclusion that binning of low complexity genomes can be achieved  
99 easily, we tested uBin's capability as a standalone binner compared to Emergent-Self-  
100 Organizing Maps (ESOMs) [8] on public metagenomes of the International Space Station  
101 (ISS). uBin outperformed ESOM-based binning when used as a standalone tool and when  
102 used as a curation tool of the ESOM bins (*Fig. 2A*, see Supplementary Material for details).  
103 Using uBin, we successfully reconstructed 53 genomes with at least 94 percent completeness  
104 (*Fig. 2B*) and only 6% or less contamination (see *Tab. S2* for completeness and contamination  
105 statistics of recovered ISS genomes). When comparing their phylogenetic placement based  
106 on 16 ribosomal proteins to the taxonomic classification of uBin, we observed agreement  
107 between the taxonomic classification methods (see *Tab. S3* for the phylogenetic and uBin-  
108 based taxonomic placement of genomes). The one exception was the genome  
109 ISS\_JPL\_2332\_S1\_L003\_Corynebacterium\_afermentans\_66\_84, which was phylo-  
110 genetically placed next to a *Turicella* genome [17]. This genome has since been reclassified  
111 as *Corynebacterium otitidis* ATCC 51513 (NZ\_AHAE00000000, see File S1 for the full  
112 phylogenetic tree).

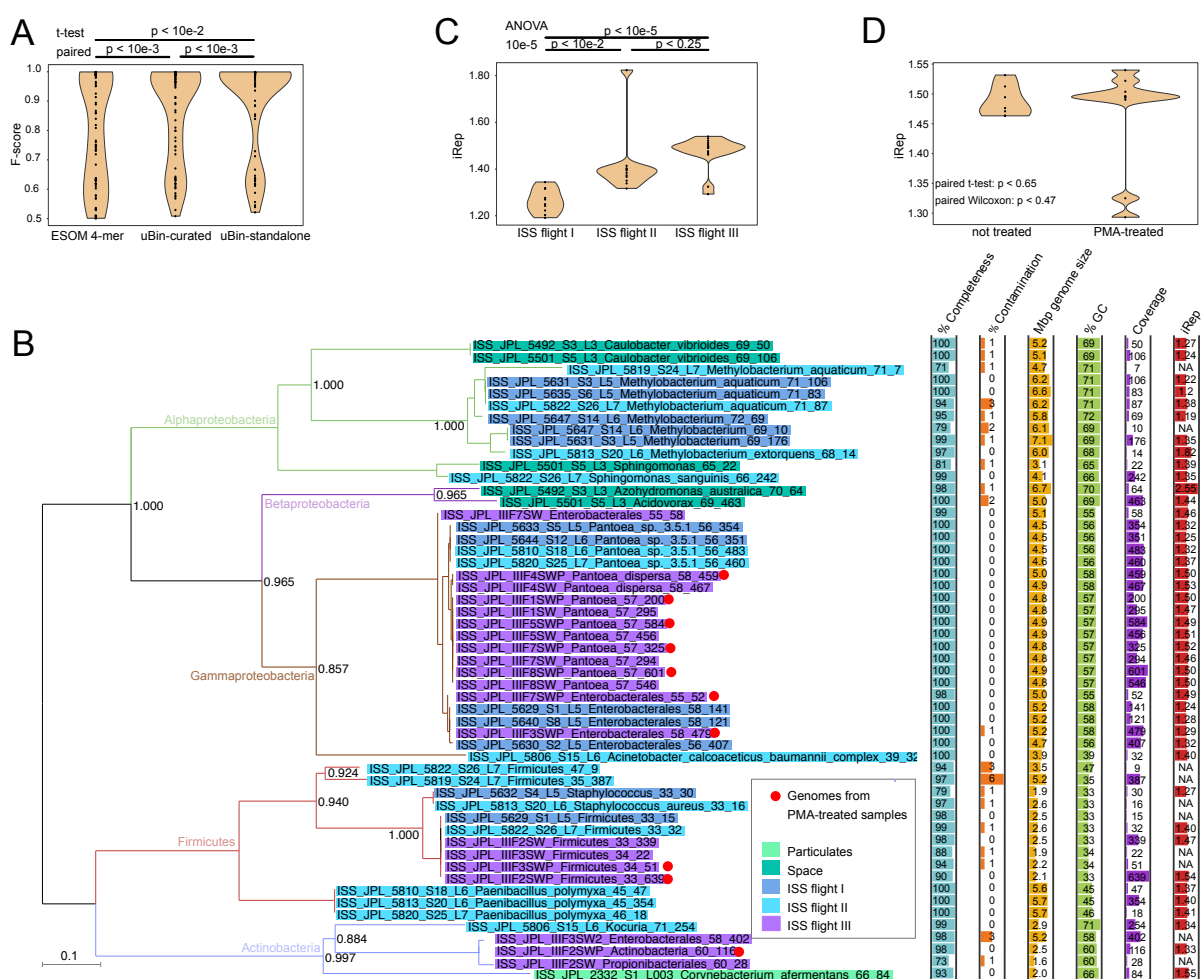

113 **Fig. 2 | Reconstruction of genomes from the ISS, scoring of their curation and their**  
 114 **phylogeny. A:** Comparison of genome statistics after ESOM 4-mer binning, after uBin  
 115 curation and after standalone binning using uBin. p-values correspond to paired Welch t-tests.  
 116 **B:** Phylogenetic reconstruction based on the concatenation of 16 ribosomal proteins of 53  
 117 genomes from ISS metagenomes when using uBin as standalone binner. Branch colors  
 118 indicate phyla assignments with coloring of leaves on tree displaying the sampling origin of  
 119 the genomes. Genomes from PMA-treated samples (see main text) are highlighted with a red  
 120 circle. The bargraphs on the right panel display completeness, contamination, genome size,  
 121 GC content, coverage (relative abundance based on read-mapping) and the *in situ* replication  
 122 measure (iRep [1]). **C:** Replication index dependency on flight of origin and significance testing  
 123 thereof using ANOVA followed by TukeyHSD. **D:** Effect of PMA-treatment for removal of  
 124 extracellular DNA on iRep of genomes from PMA-treated samples having increased iRep  
 125 variance but no significant differences in iRep value based on paired Wilcoxon and paired t-  
 126 tests (n=7 per group). Genomes were paired based on sample ID as well as using their shared  
 127 uBin-taxonomy and GC content.  
 128

129 These bins represent an important step for space science since these are the first  
 130 environmental genomes reconstructed from the ISS or associated transport flights. To  
 131 investigate if the genomes are actively replicated under these conditions, we calculated the *in*  
 132 *situ* replication measure iRep [1] for 43 out of 53 genomes. Across all sampling sites, the

133 replication rates of the recovered population genomes varied from 1.20 to 2.55, which implies  
134 an active metabolism. For instance, the lowest iRep value, which was calculated for  
135 *Methylobacterium aquaticum*, indicated that on average 20% of its sampled population was  
136 undergoing genome replication. While closely related organisms often had similar replication  
137 measures (Fig. S3), the main discriminatory factor for varying replication indices was the origin  
138 of the flight (Fig. 2C) indicating community-wide shifts in replication between the different  
139 flights. The dataset also enabled the answer to a long-standing question of indoor  
140 microbiology relating to how external DNA influences the measurements of iRep values in  
141 metagenomics. Samples of the third sampled ISS flight were analyzed using both regular  
142 metagenomics as well as metagenomics following propidium monoazide (PMA) treatment,  
143 which removes external DNA fragments and enables DNA sequencing of cells with intact  
144 membranes. When comparing the iRep values of the paired samples (n=7 per group), no  
145 significant difference could be observed (paired t- and Wilcoxon-tests, Fig. 2D), although the  
146 variance of the iRep values increased tremendously after PMA treatment. Equivalence testing  
147 confirmed that there are no differences between these two sample types ( $p < 0.01$ ). We  
148 suggest that PMA-treatment can improve the accuracy of iRep measures of environmental  
149 samples and recommend its usage where appropriate.

150         The herein presented uBin software is designed for improvement of bins and as a  
151 standalone binner for simple metagenomes with few species. It is independent of the operating  
152 system (available for Windows, MacOS, Linux) and GUI-based so that a wide audience of  
153 non-bioinformaticians can make use of it. The initial data processing (as general metagenomic  
154 data processing) necessitates bioinformatics knowledge but respective easy-to-use wrapper  
155 scripts are provided along with the software. Thus, uBin is ideally used by bioinformaticians to  
156 communicate metagenomic data to non-bioinformatics peers and to students in classrooms.  
157 After binning or curation with uBin, the user can deploy each genome into individual fasta files.  
158 These genomes can then be further explored for metabolic analyses with, e.g., MAGE [18] or  
159 KEGG mapper [19]. Consequently, uBin represents an important software link between  
160 automated bidders along with the widely-used software DAS Tool and downstream analyses  
161 including genome refinement to completion [20].

162  
163

## 164 **Acknowledgments**

165 This study was funded by the Ministerium für Kultur und Wissenschaft des Landes Nordrhein-  
166 Westfalen ("Nachwuchsgruppe Dr. Alexander Probst"). We thank the students who tested and  
167 worked with uBin over the last two years in classrooms. We thank Christine Sun for her  
168 contribution to the script for calculating consensus taxonomy of scaffolds and Kasthuri

169 Venkateswaran for input regarding sampling locations of the ISS samples. We thank Ken  
170 Dreger for the administration and maintenance of our servers.

## 171 **References**

- 172 1. Brown CT, Olm MR, Thomas BC, Banfield JF. Measurement of bacterial replication rates  
173 in microbial communities. *Nat Biotechnol.* 2016;34:1256–63.
- 174 2. Moss EL, Maghini DG, Bhatt AS. Complete, closed bacterial genomes from microbiomes  
175 using nanopore sequencing. *Nat Biotechnol.* 2020;38:1–7.
- 176 3. Singleton CM, Petriglieri F, Kristensen JM, Kirkegaard RH, Michaelsen TY, Andersen MH,  
177 et al. Connecting structure to function with the recovery of over 1000 high-quality activated  
178 sludge metagenome-assembled genomes encoding full-length rRNA genes using long-read  
179 sequencing. *bioRxiv.* 2020;2020.05.12.088096.
- 180 4. Teeling H, Meyerdierks A, Bauer M, Amann R, Glöckner FO. Application of  
181 tetranucleotide frequencies for the assignment of genomic fragments. *Environ Microbiol.*  
182 2004;6:938–47.
- 183 5. Albertsen M, Hugenholtz P, Skarshewski A, Nielsen KL, Tyson GW, Nielsen PH. Genome  
184 sequences of rare, uncultured bacteria obtained by differential coverage binning of multiple  
185 metagenomes. *Nat Biotechnol.* 2013;31:533–8.
- 186 6. Sieber CMK, Probst AJ, Sharrar A, Thomas BC, Hess M, Tringe SG, et al. Recovery of  
187 genomes from metagenomes via a dereplication, aggregation and scoring strategy. *Nat*  
188 *Microbiol.* 2018;3:836–43.
- 189 7. Wu Y-W, Simmons BA, Singer SW. MaxBin 2.0: an automated binning algorithm to  
190 recover genomes from multiple metagenomic datasets. *Bioinformatics.* 2016;32:605–7.
- 191 8. Dick GJ, Andersson AF, Baker BJ, Simmons SL, Thomas BC, Yelton AP, et al.  
192 Community-wide analysis of microbial genome sequence signatures. *Genome Biol.*  
193 2009;10:R85.
- 194 9. Alneberg J, Bjarnason BS, de Bruijn I, Schirmer M, Quick J, Ijaz UZ, et al. Binning  
195 metagenomic contigs by coverage and composition. *Nat Methods.* 2014;11:1144–6.
- 196 10. Kang DD, Li F, Kirton E, Thomas A, Egan R, An H, et al. MetaBAT 2: an adaptive  
197 binning algorithm for robust and efficient genome reconstruction from metagenome  
198 assemblies. *PeerJ.* 2019;7:e7359.
- 199 11. Shaiber A, Eren AM. Composite Metagenome-Assembled Genomes Reduce the Quality  
200 of Public Genome Repositories. *mBio.* 2019;10.
- 201 12. Ballenghien M, Faivre N, Galtier N. Patterns of cross-contamination in a multispecies  
202 population genomic project: detection, quantification, impact, and solutions. *BMC Biol.*  
203 2017;15:25.
- 204 13. Bowers RM, Kyrpides NC, Stepanauskas R, Harmon-Smith M, Doud D, Reddy TBK, et  
205 al. Minimum information about a single amplified genome (MISAG) and a metagenome-  
206 assembled genome (MIMAG) of bacteria and archaea. *Nat Biotechnol.* 2017;35:725–31.

- 207 14. Parks DH, Imelfort M, Skennerton CT, Hugenholtz P, Tyson GW. CheckM: assessing the  
208 quality of microbial genomes recovered from isolates, single cells, and metagenomes.  
209 *Genome Res.* 2015;25:1043–55.
- 210 15. Eren AM, Esen ÖC, Quince C, Vineis JH, Morrison HG, Sogin ML, et al. Anvi'o: an  
211 advanced analysis and visualization platform for 'omics data. *PeerJ.* 2015;3:e1319.
- 212 16. Wrighton KC, Thomas BC, Sharon I, Miller CS, Castelle CJ, VerBerkmoes NC, et al.  
213 Fermentation, hydrogen, and sulfur metabolism in multiple uncultivated bacterial phyla.  
214 *Science.* 2012;337:1661–5.
- 215 17. Brinkrolf K, Schneider J, Knecht M, Rückert C, Tauch A. Draft genome sequence of  
216 *Turicella otitidis* ATCC 51513, isolated from middle ear fluid from a child with otitis media. *J*  
217 *Bacteriol.* 2012;194:5968–9.
- 218 18. Vallenet D, Engelen S, Mornico D, Cruveiller S, Fleury L, Lajus A, et al. MicroScope: a  
219 platform for microbial genome annotation and comparative genomics. *Database (Oxford).*  
220 2009;2009.
- 221 19. Kanehisa M, Sato Y. KEGG Mapper for inferring cellular functions from protein  
222 sequences. *Protein Sci.* 2020;29:28–35.
- 223 20. Chen L-X, Anantharaman K, Shaiber A, Eren AM, Banfield JF. Accurate and complete  
224 genomes from metagenomes. *Genome Res.* 2020;30:315–33.
- 225 21. JN Fass NJ. Sickle: A sliding-window, adaptive, quality-based trimming tool for FastQ  
226 files. <https://github.com/najoshi/sickle>; 2011.
- 227 22. Nurk S, Meleshko D, Korobeynikov A, Pevzner PA. metaSPAdes: a new versatile  
228 metagenomic assembler. *Genome Res.* 2017;27:824–34.
- 229 23. Hyatt D, Chen G-L, LoCascio PF, Land ML, Larimer FW, Hauser LJ. Prodigal:  
230 prokaryotic gene recognition and translation initiation site identification. *BMC Bioinformatics.*  
231 2010;11:119.
- 232 24. Buchfink B, Xie C, Huson DH. Fast and sensitive protein alignment using DIAMOND. *Nat*  
233 *Methods.* 2015;12:59–60.
- 234 25. Suzek BE, Huang H, McGarvey P, Mazumder R, Wu CH. UniRef: comprehensive and  
235 non-redundant UniProt reference clusters. *Bioinformatics.* 2007;23:1282–8.
- 236 26. Langmead B, Salzberg SL. Fast gapped-read alignment with Bowtie 2. *Nat Methods.*  
237 2012;9:357–9.
- 238 27. Probst AJ, Castelle CJ, Singh A, Brown CT, Anantharaman K, Sharon I, et al. Genomic  
239 resolution of a cold subsurface aquifer community provides metabolic insights for novel  
240 microbes adapted to high CO<sub>2</sub> concentrations. *Environ Microbiol.* 2017;19:459–74.
- 241 28. Eddy SR. Accelerated Profile HMM Searches. *PLoS Comput Biol.* 2011;7:e1002195.
- 242 29. Brown CT, Hug LA, Thomas BC, Sharon I, Castelle CJ, Singh A, et al. Unusual biology  
243 across a group comprising more than 15% of domain Bacteria. *Nature.* 2015;523:208.
- 244 30. Bornemann TLV, Adam PS, Turzynski V, Schreiber U, Figueroa-Gonzalez PA, Rahlff J,  
245 et al. Geological degassing enhances microbial metabolism in the continental subsurface.  
246 *bioRxiv.* 2020;2020.03.07.980714.



- 247 31. Altschul SF, Gish W, Miller W, Myers EW, Lipman DJ. Basic local alignment search tool.  
248 J Mol Biol. 1990;215:403–10.
- 249 32. Hug LA, Baker BJ, Anantharaman K, Brown CT, Probst AJ, Castelle CJ, et al. A new  
250 view of the tree of life. Nat Microbiol. 2016;1:16048.
- 251 33. Edgar RC. MUSCLE: multiple sequence alignment with high accuracy and high  
252 throughput. Nucleic acids res. 2004;32:1792–1797.
- 253 34. Criscuolo A, Gribaldo S. BMGE (Block Mapping and Gathering with Entropy): a new  
254 software for selection of phylogenetic informative regions from multiple sequence  
255 alignments. BMC Evol Biol. 2010;10:210.
- 256 35. Price MN, Dehal PS, Arkin AP. FastTree: Computing Large Minimum Evolution Trees  
257 with Profiles instead of a Distance Matrix. Mol Biol Evol. 2009;26:1641–50.
- 258 36. Huson DH, Richter DC, Rausch C, Dezulian T, Franz M, Rupp R. Dendroscope: An  
259 interactive viewer for large phylogenetic trees. BMC Bioinformatics. 2007;8:460.
- 260 37. R Core Team. R: A Language and Environment for Statistical Computing. 2008;R  
261 Foundation for Statistical Computing, Vienna, Austria.
- 262 38. Welch BL. The generalisation of student's problems when several different population  
263 variances are involved. Biometrika. 1947;34:28–35.
- 264 39. Kruskal WH, Wallis WA. Use of Ranks in One-Criterion Variance Analysis. J AM STAT  
265 ASSOC. 1952;47:583–621.
- 266 40. St»hle L, Wold S. Analysis of variance (ANOVA). Chemometrics Intell Lab Sys.  
267 1989;6:259–72.
- 268 41. Haynes W. Tukey's Test. In: Dubitzky W, Wolkenhauer O, Cho K-H, Yokota H, editors.  
269 Encyclopedia of Systems Biology. New York, NY: Springer New York; 2013. p. 2303–4.
- 270 42. Wickham H. ggplot2: Elegant Graphics for Data Analysis. New York: Springer-Verlag;  
271 2009.
- 272 43. Lakens D, Scheel AM, Isager PM. Equivalence Testing for Psychological Research: A  
273 Tutorial: AMPPS. 2018;1:259–69.
- 274  
275  
276

277 **Supplementary Material for:**  
278  
279 **uBin – a manual refining tool for metagenomic bins designed for educational**  
280 **purposes**

281  
282 Till L.V. Bornemann<sup>1</sup>, Sarah P. Esser<sup>1</sup>, Tom L. Stach<sup>1</sup>, Tim Burg<sup>2</sup>, and Alexander J. Probst<sup>1</sup>

283  
284 1: Institute for Environmental Microbiology and Biotechnology, Department of Chemistry,  
285 University Duisburg-Essen, Germany

286 2: Tim Burg, Im Acker 59, 56072 Koblenz, Germany

287  
288 To whom the correspondence should be addressed:  
289 [alexander.probst@uni-due.de](mailto:alexander.probst@uni-due.de)

290  
291

292 **Contents**

- 293 1. Supplementary Methods  
294 2. Supplementary Figures  
295 3. Supplementary Tables  
296 4. Supplementary Files

297  
298  
299

300 **Supplementary Methods**

301  
302

303 **Software implementation.** uBin is written in TypeScript(3.2+)/JavaScript. It utilizes React  
304 (<https://reactjs.org/>) for its user interface and Redux (<https://redux.js.org/>) to manage the  
305 application state/data.

306 All imported data is stored in a local SQLite (sqlite3) database. Communication between uBin  
307 and the database is abstracted through TypeORM (<https://typeorm.io/>), an ORM written in  
308 TypeScript. To build the application and to provide cross-platform support, we use Electron  
309 (<https://www.electronjs.org/>).

310 The user interface uses HTML/CSS + Blueprint JS (a User-Interface (UI) toolkit,  
311 <https://blueprintjs.com/>) for general UI elements, react-vis (<https://uber.github.io/react-vis/>) for  
312 its Sunburst plot, and VX (a library for d3-based React visualization components,

313 <https://github.com/hshoff/vx>) for every other plot. Crossfilter  
314 (<https://github.com/crossfilter/crossfilter>) is used to calculate the data to be plotted on-the-fly.

315 **Metagenomic data assembly and processing.** Quality control of ISS metagenome raw  
316 reads was performed using BBduk (B Bushnell, <http://jgi.doe.gov/data-and-tools/bb-tools/>)  
317 and Sickle [21]. Reads were assembled into contigs and scaffolded using metaSPAdes 3.12  
318 [22] (see *Tab. S5* for read and assembly statistics). Genes were predicted for scaffolds larger  
319 than 1 kbp using Prodigal [23] in meta mode and annotated using DIAMOND [24] against  
320 UniRef100 (state Dec. 2017) [25], modified with NCBI taxonomic information of the respective  
321 protein sequences (FunTaxDB, tentatively accessible through [https://uni-duisburg-](https://uni-duisburg-essen.sciebo.de/s/pi4cuYwyZ3KJVMI)  
322 [essen.sciebo.de/s/pi4cuYwyZ3KJVMI](https://uni-duisburg-essen.sciebo.de/s/pi4cuYwyZ3KJVMI)). The consensus taxonomy of each scaffold was  
323 predicted by considering the taxonomic rank of each protein on the scaffold on each taxonomic  
324 level and choosing the lowest taxonomic rank when more than 50% of the protein taxonomies  
325 agree. Reads were mapped to scaffolds using Bowtie2 [26] and the average scaffold coverage  
326 was estimated along with scaffolds' length and GC content. Previously published ubiquitous  
327 single copy genes [27] were identified using HHmer 3.2 [28] and custom tables collecting GC,  
328 coverage, length, taxonomy and presence / absence of single copy genes of scaffolds were  
329 generated using scripts available along with uBin under [https://github.com/ProbstLab/uBin-](https://github.com/ProbstLab/uBin-helperscripts)  
330 [helperscripts](https://github.com/ProbstLab/uBin-helperscripts).

331 **Binning and curation.** ISS assemblies were binned using Emergent Self-Organizing Maps  
332 (ESOM) [8]. Scaffolds were fragmented using the *esomWrapper.pl* [8] script, using 10kbp and  
333 5kbp as maximum and minimum fragment sizes respectively. *Streptomyces griseus*  
334 NBRC13350 (high GC, NC\_010572.1) and *Escherichia coli* K12 (low GC, NC\_000913.3)  
335 genomes were spiked in to verify successful ESOM training. For ESOM training, the starting  
336 radius was set to 50 and the map-size was adjusted to the suggested size in the  
337 *esomWrapper.pl* output. ISS data was additionally binned directly using uBin.

338 CAMI datasets were binned using the automatic binners *abawaca* [29] and *MaxBin2*  
339 [7], using both 3 kbp and 5 kbp as well as 5kbp and 10kbp as minimum and maximum fragment  
340 sizes respectively as *abawaca* input and using both available marker gene sets of *MaxBin2*  
341 for binning. The output of the four different binners was aggregated using DAS Tool [6]. Tomsk  
342 and SulCav binning has been described previously [30].

343 Tables containing Bin, GC, coverage, length, taxonomy and single copy gene  
344 presence / absence information were loaded into uBin and used to curate draft genomes.  
345 Coding regions and single copy genes on genomes were predicted as described, omitting the  
346 -meta flag in prodigal.

347 **Calculation of in situ replication indices.** Bacterial *in situ* replication indices (iRep [1]) were  
348 calculated by mapping reads on the genomes and filtered for 3 mismatches, which correspond

349 to 2% mismatch rate in the 150 bp reads. The rest of the settings for the iRep software were  
350 default.

351 **Estimation of sample complexity.** The sample complexity was estimated using the diversity  
352 of the *rpS3* marker gene. *rpS3* genes were annotated as described above. We are aware that  
353 sample complexity can also stem from other factors like K-mer frequency or coverage  
354 distribution patterns that this estimation does not take into account. However, these metrics  
355 cannot be assessed for environmental samples easily as the real composition is unknown.  
356 See *Tab. S4* for *rpS3* based complexity estimates across analyzed samples.

357 **Phylogenomics.** Ribosomal proteins were identified with blastp [31] (e-value  $10^{-5}$ ) against 16  
358 ribosomal proteins set as used in [32], aligned using muscle [33] with default parameters,  
359 trimmed with BMGE [34] and the BLOSUM30 substitution matrix and concatenated. The  
360 phylogenetic tree was calculated using Fasttree 2.1.8 [35] with default parameters. The tree  
361 was visualized in Dendroscope 3.7.2 [36].

362 **Calculation of F-scores.** Precision and recall of CAMI bins were determined using the known  
363 genomic assignment of the scaffolds and where they were allocated to during binning and  
364 curation. Genomic bins were assigned as corresponding to a CAMI genome based on the  
365 maximum scaffolds belonging to the same CAMI genome. Precision and recall of genomes  
366 from real-world datasets were determined using completeness as a proxy for True Positives,  
367 1-%completeness as False Negatives, contamination as a proxy for False Positives and 1-  
368 contamination as True Negatives. The F-score was calculated as the mean between precision  
369 and recall.

370 **Statistical evaluation.** Statistical evaluation was performed in R [37]. Both paired and  
371 unpaired Welch t-tests [38] as well as Kruskal-Wallis [39] tests, one- and two-way ANOVA's  
372 [40] and TukeyHSD [41] significance tests were performed. ggplot2 [42] was used to visualize  
373 data. The TOSTpaired.raw function within the TOSTER [43] package was used to confirm the  
374 non-significance of PMA-related tests, using 0.1 as the equivalence bound.

375 **Metagenome availability.** Accessions to raw reads and assemblies used in this study are  
376 listed in *Tab. S4*.

377 **Software availability.** The platform-independent genome curation software uBin is freely  
378 available under the MIT license at <https://github.com/ProbstLab/uBin>. The installation of the  
379 software from the OS-dedicated installers is dependency-free, while source code installation  
380 requires a Unix-based OS and package managers like npm or yarn.

381  
382  
383  
384

385 **Supplementary Figures**  
386

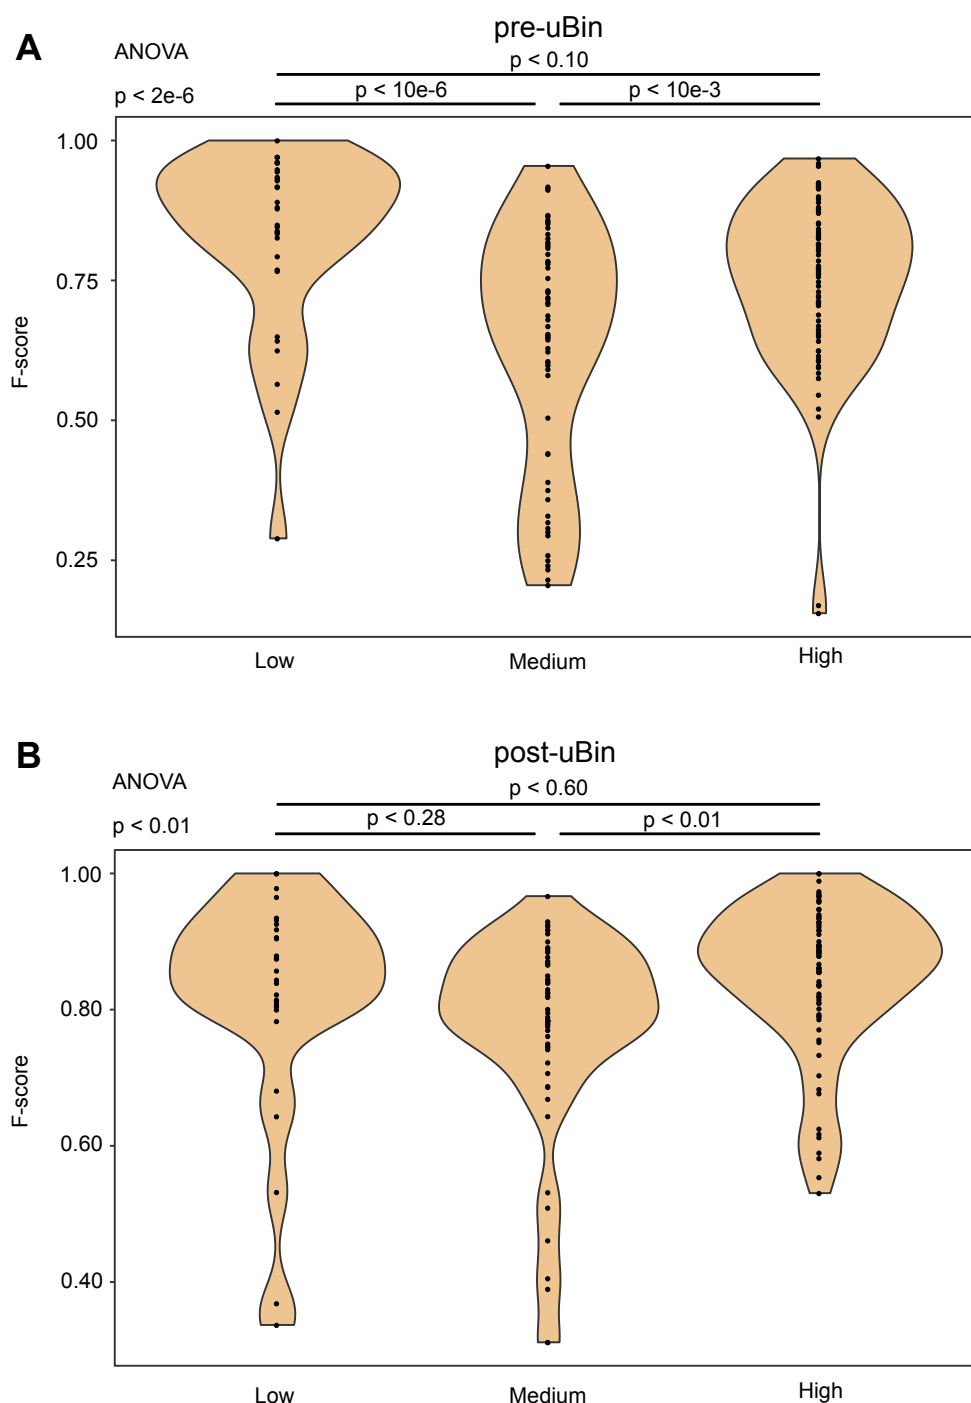

387 **Fig. S1 | Comparison of bin qualities before and after uBin curation in simulated**  
388 **datasets with varying complexity.** Compared are the bin qualities within bins before uBin  
389 (A) and within bins after uBin (B) in different complexities. ANOVA followed by the TukeyHSD  
390 post-hoc test were used to identify significant differences in quality between complexity  
391 groups.  
392  
393  
394

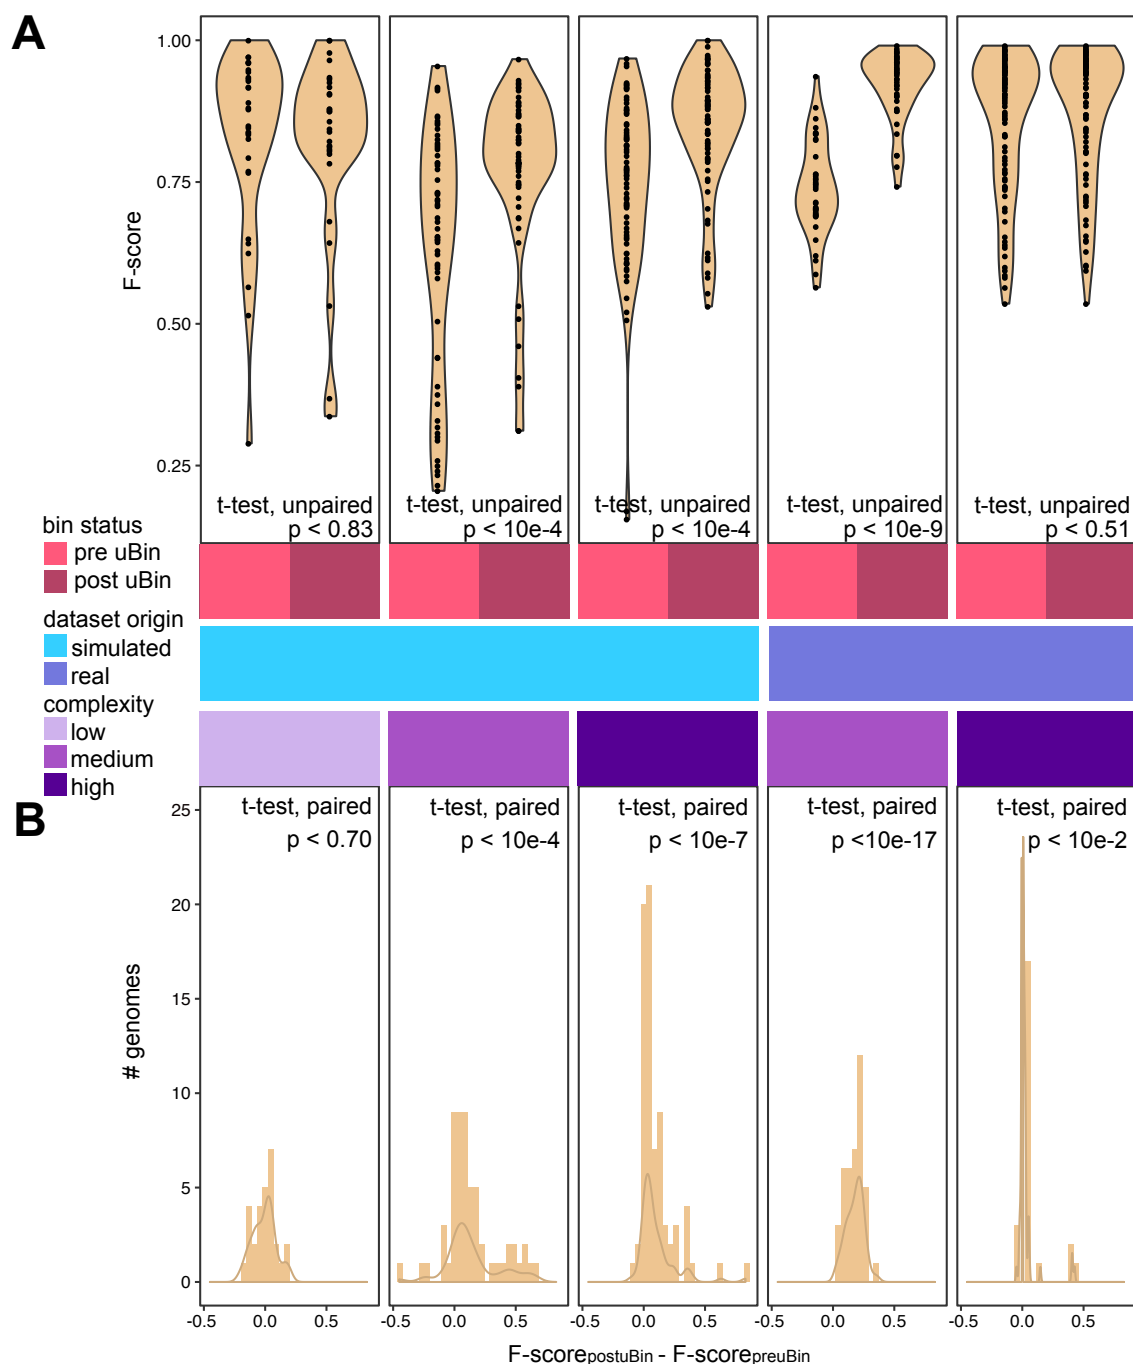

395  
396  
397  
398  
399  
400  
401  
402  
403  
404

**Fig. S2 | Performance of uBin on simulated and real datasets with varying degrees of complexity. A:** Violin plots of the F-score (mean between recall and precision) of genomes prior to uBin curation (pre uBin) and after uBin curation (post uBin) across simulated low, medium and high complexity datasets of the CAMI challenge as well as real world metagenomic datasets of medium (Tomsk) and high (SulCav AS07-7) complexity. Unpaired Welch t-test p values are depicted. **B:** Histograms of the F-score differences for each bin prior and post uBin curation and their density distribution. Paired Welch t-test p-values are depicted.

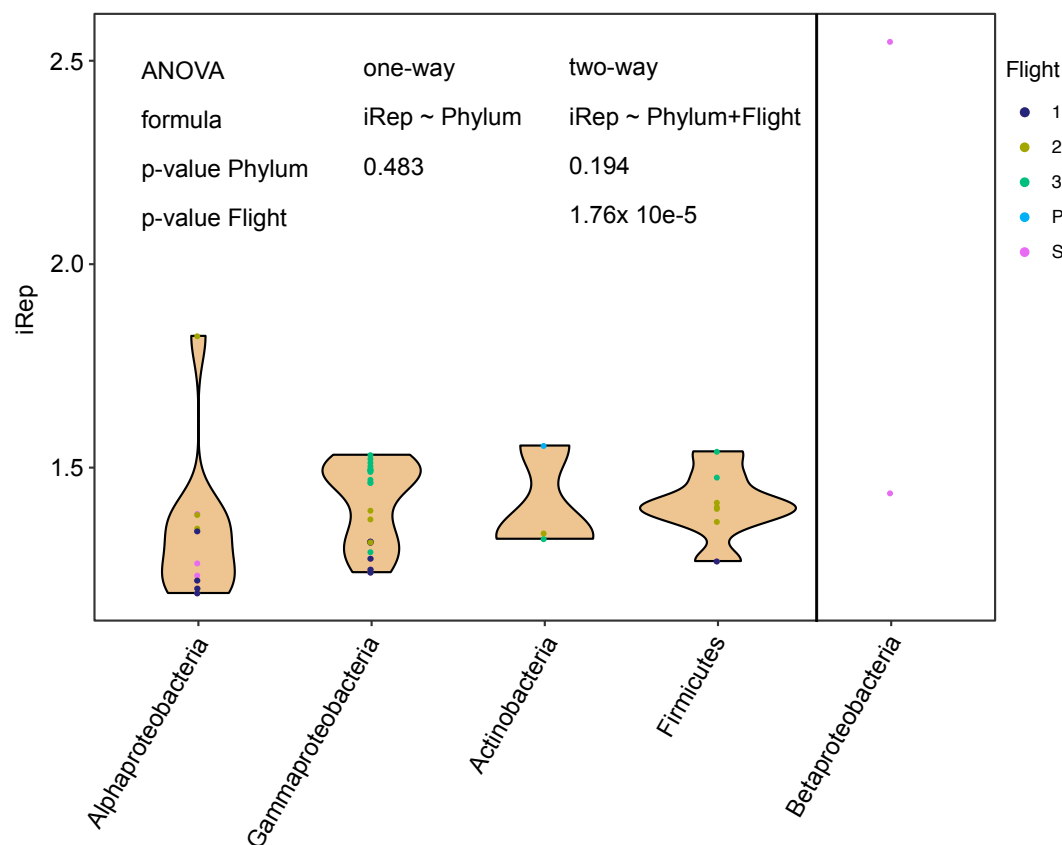

405  
 406  
 407  
 408  
 409  
 410  
 411  
 412  
 413  
 414

**Fig. S3 | iRep distribution of ISS genomes by phylum.** One- and two-way ANOVA were performed for significance testing. The Betaproteobacteria were excluded for the statistical analyses because of too few and highly diverging datapoints. No significant influence of the species was determined while the flight of origin was a significant coefficient in the two-way ANOVA analyses.

415 **Supplementary Tables**

416

417 **Tab. S1 | F-scores pre- and post-uBin of CAMI, Tomsk and SulCav datasets.**

418

419 TableS1\_Fscores\_CAMI\_Tomsk\_SulCav.xlsx

420

421 **Tab. S2 | Genome statistics of recovered ISS genomes from metagenomes based on**  
 422 **CheckM [14].**

423

424

| Genome                                                                    | Completeness | Contamination |
|---------------------------------------------------------------------------|--------------|---------------|
| ISS_JPL_2332_S1_L003_Corynebacterium_ afermentans_66_84                   | 92.99        | 0.44          |
| ISS_JPL_5492_S3_L3_Azohydromonas_ australica_70_64                        | 98.22        | 0.62          |
| ISS_JPL_5492_S3_L3_Caulobacter_ vibrioides_69_50                          | 99.97        | 1.14          |
| ISS_JPL_5501_S5_L3_Acidovorax_ 69_463                                     | 99.81        | 2.19          |
| ISS_JPL_5501_S5_L3_Caulobacter_ vibrioides_69_106                         | 99.97        | 1.14          |
| ISS_JPL_5501_S5_L3_Sphingomonas_ 65_22                                    | 81.37        | 0.85          |
| ISS_JPL_5629_S1_L5_Enterobacterales_ 58_141                               | 100.00       | 0.32          |
| ISS_JPL_5629_S1_L5_Firmicutes_ 33_15                                      | 98.06        | 0.28          |
| ISS_JPL_5630_S2_L5_Enterobacterales_ 56_407                               | 99.97        | 0.33          |
| ISS_JPL_5631_S3_L5_Methylobacterium_ 69_176                               | 99.06        | 1.25          |
| ISS_JPL_5631_S3_L5_Methylobacterium_ aquaticum_71_106                     | 99.37        | 0.16          |
| ISS_JPL_5632_S4_L5_Staphylococcus_ 33_30                                  | 78.70        | 1.14          |
| ISS_JPL_5633_S5_L5_Pantoea_ sp._3.5.1_56_354                              | 100.00       | 0.12          |
| ISS_JPL_5635_S6_L5_Methylobacterium_ aquaticum_71_83                      | 100.00       | 0.16          |
| ISS_JPL_5640_S8_L5_Enterobacterales_ 58_121                               | 100.00       | 0.34          |
| ISS_JPL_5644_S12_L6_Pantoea_ sp._3.5.1_56_351                             | 99.94        | 0.12          |
| ISS_JPL_5647_S14_L6_Methylobacterium_ 69_10                               | 79.10        | 1.88          |
| ISS_JPL_5647_S14_L6_Methylobacterium_ 72_69                               | 95.30        | 0.86          |
| ISS_JPL_5806_S15_L6_Acinetobacter_ calcoaceticus_baumannii_ complex_39_32 | 99.45        | 0.31          |
| ISS_JPL_5806_S15_L6_Kocuria_ 71_254                                       | 99.34        | 0.00          |
| ISS_JPL_5810_S18_L6_Paenibacillus_ polymyxa_45_47                         | 99.85        | 0.00          |
| ISS_JPL_5810_S18_L6_Pantoea_ sp._3.5.1_56_483                             | 100.00       | 0.12          |
| ISS_JPL_5813_S20_L6_Methylobacterium_ extorquens_68_14                    | 96.96        | 0.35          |
| ISS_JPL_5813_S20_L6_Paenibacillus_ polymyxa_45_354                        | 99.85        | 0.00          |
| ISS_JPL_5813_S20_L6_Staphylococcus_ aureus_33_16                          | 96.91        | 0.84          |
| ISS_JPL_5819_S24_L7_Firmicutes_ 35_387                                    | 97.35        | 6.33          |
| ISS_JPL_5819_S24_L7_Methylobacterium_ aquaticum_71_7                      | 70.53        | 0.50          |
| ISS_JPL_5820_S25_L7_Paenibacillus_ polymyxa_46_18                         | 99.58        | 0.12          |
| ISS_JPL_5820_S25_L7_Pantoea_ sp._3.5.1_56_460                             | 100.00       | 0.12          |
| ISS_JPL_5822_S26_L7_Firmicutes_ 33_32                                     | 98.89        | 0.76          |
| ISS_JPL_5822_S26_L7_Firmicutes_ 47_9                                      | 93.57        | 3.08          |
| ISS_JPL_5822_S26_L7_Methylobacterium_ aquaticum_71_87                     | 99.37        | 0.16          |



|                                            |        |      |
|--------------------------------------------|--------|------|
| ISS_JPL_5822_S26_L7_Sphingomonas_sanguinis | 99.42  | 0.44 |
| ISS_JPL_IIIF1SWP_Pantoea_57_200            | 99.95  | 0.25 |
| ISS_JPL_IIIF1SW_Pantoea_57_295             | 99.95  | 0.33 |
| ISS_JPL_IIIF2SWP_Actinobacteria_60_116     | 98.27  | 0.23 |
| ISS_JPL_IIIF2SWP_Firmicutes_33_639         | 90.00  | 0.00 |
| ISS_JPL_IIIF2SW_Firmicutes_33_339          | 97.96  | 0.00 |
| ISS_JPL_IIIF2SW_Propionibacteriales_60_28  | 72.82  | 1.32 |
| ISS_JPL_IIIF3SW2_Enterobacterales_58_402   | 98.23  | 2.72 |
| ISS_JPL_IIIF3SW2_Firmicutes_34_22          | 87.90  | 0.56 |
| ISS_JPL_IIIF3SWP_Enterobacterales_58_479   | 100.00 | 0.46 |
| ISS_JPL_IIIF3SWP_Firmicutes_34_51          | 93.80  | 0.83 |
| ISS_JPL_IIIF4SWP_Pantoea_dispersa_58_459   | 100.00 | 0.38 |
| ISS_JPL_IIIF4SW_Pantoea_dispersa_58_467    | 100.00 | 0.38 |
| ISS_JPL_IIIF5SWP_Pantoea_57_584            | 100.00 | 0.33 |
| ISS_JPL_IIIF5SW_Pantoea_57_456             | 100.00 | 0.25 |
| ISS_JPL_IIIF7SWP_Enterobacterales_55_52    | 98.18  | 0.21 |
| ISS_JPL_IIIF7SWP_Pantoea_57_325            | 99.80  | 0.33 |
| ISS_JPL_IIIF7SW_Enterobacterales_55_58     | 99.03  | 0.20 |
| ISS_JPL_IIIF7SW_Pantoea_57_294             | 100.00 | 0.33 |
| ISS_JPL_IIIF8SWP_Pantoea_57_601            | 100.00 | 0.33 |
| ISS_JPL_IIIF8SW_Pantoea_57_546             | 100.00 | 0.33 |

425  
426  
427  
428  
429  
430

**Tab. S3 | Phylogenetic characterization of recovered genomes.** 16 ribosomal proteins were used to phylogenetically place the genomes. The taxonomy of the genomes represents the consensus taxonomy.

| Genome                                                 | Phylogenetic Placement                     |
|--------------------------------------------------------|--------------------------------------------|
| ISS_JPL_2332_S1_L003_Corynebacterium_afermentans_66_84 | Turicella_otitidis_AtCC_51513              |
| ISS_JPL_5492_S3_L3_Azohydromonas_australica_70_64      | Azohydromonas_australica_DSM_1124          |
| ISS_JPL_5492_S3_L3_Caulobacter_vibrioides_69_50        | Caulobacter_segneis_ATCC_21756             |
| ISS_JPL_5501_S5_L3_Acidovorax_69_463                   | Acidovorax_avenae_subsp._citrullii_AAC00_1 |
| ISS_JPL_5501_S5_L3_Caulobacter_vibrioides_69_106       | Caulobacter_segneis_ATCC_21756             |
| ISS_JPL_5501_S5_L3_Sphingomonas_65_22                  | Sphingomonas_japonicum_UT26S_1             |
| ISS_JPL_5629_S1_L5_Enterobacterales_58_141             | Enterobacteriaceae                         |
| ISS_JPL_5629_S1_L5_Firmicutes_33_15                    | Staphylococcus_aureus_502A                 |

|                                                                         |                                     |
|-------------------------------------------------------------------------|-------------------------------------|
| ISS_JPL_5630_S2_L5_Enterobacterales_56_407                              | Enterobacteriaceae                  |
| ISS_JPL_5631_S3_L5_Methylobacterium_69_176                              | Methylobacterium_extorquens_P<br>A1 |
| ISS_JPL_5631_S3_L5_Methylobacterium_aquaticum_71_106                    | Methylobacterium                    |
| ISS_JPL_5632_S4_L5_Staphylococcus_33_30                                 | Staphylococcus_aureus_502A          |
| ISS_JPL_5633_S5_L5_Pantoea_sp._3.5.1_56_354                             | Pantoea_anantis_LMG_5342            |
| ISS_JPL_5635_S6_L5_Methylobacterium_aquaticum_71_83                     | Methylobacterium                    |
| ISS_JPL_5640_S8_L5_Enterobacterales_58_121                              | Enterobacteriaceae                  |
| ISS_JPL_5644_S12_L6_Pantoea_sp._3.5.1_56_351                            | Pantoea_anantis_LMG_5342            |
| ISS_JPL_5647_S14_L6_Methylobacterium_69_10                              | Methylobacterium_extorquens_P<br>A1 |
| ISS_JPL_5647_S14_L6_Methylobacterium_72_69                              | Methylobacterium                    |
| ISS_JPL_5806_S15_L6_Acinetobacter_calcoaceticus_baumannii_complex_39_32 | Acinetobacter_baumannii_AB30        |
| ISS_JPL_5806_S15_L6_Kocuria_71_254                                      | Kocuria_rhizophila_DC2201           |
| ISS_JPL_5810_S18_L6_Paenibacillus_polymyxa_45_47                        | Paenibacillus_lactis_154            |
| ISS_JPL_5810_S18_L6_Pantoea_sp._3.5.1_56_483                            | Pantoea_anantis_LMG_5342            |
| ISS_JPL_5813_S20_L6_Methylobacterium_extorquens_68_14                   | Methylobacterium_extorquens_P<br>A1 |
| ISS_JPL_5813_S20_L6_Paenibacillus_polymyxa_45_354                       | Paenibacillus_lactis_154            |
| ISS_JPL_5813_S20_L6_Staphylococcus_aureus_33_16                         | Staphylococcus_aureus_502A          |
| ISS_JPL_5819_S24_L7_Firmicutes_35_387                                   | Bacillus_anthraxis_52_G             |
| ISS_JPL_5819_S24_L7_Methylobacterium_aquaticum_71_7                     | Methylobacterium                    |
| ISS_JPL_5820_S25_L7_Paenibacillus_polymyxa_46_18                        | Paenibacillus_lactis_154            |
| ISS_JPL_5820_S25_L7_Pantoea_sp._3.5.1_56_460                            | Pantoea_anantis_LMG_5342            |
| ISS_JPL_5822_S26_L7_Firmicutes_33_32                                    | Staphylococcus_aureus_502A          |
| ISS_JPL_5822_S26_L7_Firmicutes_47_9                                     | Bacillus_anthraxis_52_G             |
| ISS_JPL_5822_S26_L7_Methylobacterium_aquaticum_71_87                    | Methylobacterium                    |
| ISS_JPL_5822_S26_L7_Sphingomonas_sanguinis                              | Sphingomonas<br>japonicum_UT26S_1   |
| ISS_JPL_IIIF1SWP_Pantoea_57_200                                         | Pantoea_anantis_LMG_5342            |
| ISS_JPL_IIIF1SW_Pantoea_57_295                                          | Pantoea_anantis_LMG_5342            |
| ISS_JPL_IIIF2SWP_Actinobacteria_60_116                                  | Propionibacterium_acnes             |
| ISS_JPL_IIIF2SWP_Firmicutes_33_639                                      | Staphylococcus_aureus_502A          |
| ISS_JPL_IIIF2SW_Firmicutes_33_339                                       | Staphylococcus_aureus_502A          |
| ISS_JPL_IIIF2SW_Propionibacteriales_60_28                               | Propionibacterium_acnes             |
| ISS_JPL_IIIF3SW2_Enterobacterales_58_402                                | Propionibacterium_acnes             |
| ISS_JPL_IIIF3SW2_Firmicutes_34_22                                       | Staphylococcus_aureus_502A          |
| ISS_JPL_IIIF3SWP_Enterobacterales_58_479                                | Enterobacteriaceae                  |
| ISS_JPL_IIIF3SWP_Firmicutes_34_51                                       | Staphylococcus_aureus_502A          |

|                                          |                          |
|------------------------------------------|--------------------------|
| ISS_JPL_IIIF4SWP_Pantoea_dispersa_58_459 | Pantoea_anantis_LMG_5342 |
| ISS_JPL_IIIF4SW_Pantoea_dispersa_58_467  | Pantoea_anantis_LMG_5342 |
| ISS_JPL_IIIF5SWP_Pantoea_57_584          | Pantoea_anantis_LMG_5342 |
| ISS_JPL_IIIF5SW_Pantoea_57_456           | Pantoea_anantis_LMG_5342 |
| ISS_JPL_IIIF7SWP_Enterobacterales_55_52  | Enterobacteriaceae       |
| ISS_JPL_IIIF7SWP_Pantoea_57_325          | Pantoea_anantis_LMG_5342 |
| ISS_JPL_IIIF7SW_Enterobacterales_55_58   | Enterobacteriaceae       |
| ISS_JPL_IIIF7SW_Pantoea_57_294           | Pantoea_anantis_LMG_5342 |
| ISS_JPL_IIIF8SWP_Pantoea_57_601          | Pantoea_anantis_LMG_5342 |
| ISS_JPL_IIIF8SW_Pantoea_57_546           | Pantoea_anantis_LMG_5342 |

431  
432  
433  
434  
435  
436  
437  
438  
439

**Tab. S4 | Sample accessions and complexity based on the *rpS3* marker gene.** Simulated low, medium and high complexity assembly and read datasets from the 1st CAMI challenge were downloaded from <https://data.cami-challenge.org/participate>. Raw reads from ISS flights I and II can be downloaded from the GeneLabs website (<https://genelab-data.ndc.nasa.gov/genelab/accession/GLDS-66/>).

| Sample                | Read Accession    | # rpS3 genes | Complexity category |
|-----------------------|-------------------|--------------|---------------------|
| CAMI_low              | See table caption | 30           | Low                 |
| CAMI_medium_S1        | See table caption | 98           | Medium              |
| CAMI_high_S1          | See table caption | 404          | High                |
| Tomsk                 | SRR7102746        | 46           | Low-Medium          |
| SulCav_AS07-7         | SRR1559028        | 151          | Medium-High         |
| ISS_JPL_2332_S1_L003  | See table caption | 9            | Low                 |
| ISS_JPL_2333_S2_L003  | See table caption | 1            | Low                 |
| ISS_JPL_5492_S3_L003  | See table caption | 7            | Low                 |
| ISS_JPL_5501_S5_L003  | See table caption | 10           | Low                 |
| ISS_JPL_5629_S1_L005  | See table caption | 4            | Low                 |
| ISS_JPL_5630_S2_L005  | See table caption | 1            | Low                 |
| ISS_JPL_5631_S3_L005  | See table caption | 2            | Low                 |
| ISS_JPL_5632_S4_L005  | See table caption | 3            | Low                 |
| ISS_JPL_5633_S5_L005  | See table caption | 1            | Low                 |
| ISS_JPL_5635_S6_L005  | See table caption | 4            | Low                 |
| ISS_JPL_5640_S8_L005  | See table caption | 4            | Low                 |
| ISS_JPL_5644_S12_L006 | See table caption | 1            | Low                 |
| ISS_JPL_5647_S14_L006 | See table caption | 2            | Low                 |
| ISS_JPL_5806_S15_L006 | See table caption | 5            | Low                 |
| ISS_JPL_5808_S16_L006 | See table caption | 5            | Low                 |
| ISS_JPL_5810_S18_L006 | See table caption | 2            | Low                 |
| ISS_JPL_5813_S20_L006 | See table caption | 3            | Low                 |

|                       |                   |   |     |
|-----------------------|-------------------|---|-----|
| ISS_JPL_5818_S23_L007 | See table caption | 2 | Low |
| ISS_JPL_5819_S24_L007 | See table caption | 5 | Low |
| ISS_JPL_5820_S25_L007 | See table caption | 2 | Low |
| ISS_JPL_5822_S26_L007 | See table caption | 4 | Low |
| ISS_JPL_IIIF1SWP      | SRX3808505        | 1 | Low |
| ISS_JPL_IIIF1SW       | SRX3808512        | 1 | Low |
| ISS_JPL_IIIF2SWP      | SRX3808504        | 3 | Low |
| ISS_JPL_IIIF2SW       | SRX3808511        | 2 | Low |
| ISS_JPL_IIIF3SWP      | SRX3808503        | 2 | Low |
| ISS_JPL_IIIF3SW       | SRX3808514        | 2 | Low |
| ISS_JPL_IIIF4SWP      | SRX3808508        | 1 | Low |
| ISS_JPL_IIIF4SW       | SRX3808513        | 1 | Low |
| ISS_JPL_IIIF5SWP      | SRX3808507        | 1 | Low |
| ISS_JPL_IIIF5SW       | SRX3808510        | 1 | Low |
| ISS_JPL_IIIF7SWP      | SRX3808529        | 1 | Low |
| ISS_JPL_IIIF7SW       | SRX3808509        | 1 | Low |
| ISS_JPL_IIIF8SWP      | SRX3808530        | 1 | Low |
| ISS_JPL_IIIF8SW       | SRX3808535        | 1 | Low |

440

441

442 **Tab. S5 | ISS metagenome assembly statistics.** Assembly statistics for SulCav AS07-7 and  
 443 Tomsk metagenomes have been previously reported [30].

444

| Sample                | #Gbp reads<br>after QC | #Mbp<br>scaffolds | #Mbp scaffolds ><br>1Kbp length | N50 scaffolds ><br>1Kbp length |
|-----------------------|------------------------|-------------------|---------------------------------|--------------------------------|
| ISS_JPL_2332_S1_L003  | 9.5                    | 859.2             | 54.7                            | 1335                           |
| ISS_JPL_2333_S2_L003  | 0.3                    | 4.3               | 0.4                             | 1344                           |
| ISS_JPL_5492_S3_L003  | 6.7                    | 87.6              | 65.9                            | 10284                          |
| ISS_JPL_5501_S5_L003  | 6.5                    | 84.5              | 62.7                            | 7814                           |
| ISS_JPL_5629_S1_L005  | 3.6                    | 127.2             | 76.4                            | 38542                          |
| ISS_JPL_5630_S2_L005  | 2.1                    | 13.7              | 10.2                            | 19268                          |
| ISS_JPL_5631_S3_L005  | 3.6                    | 68.5              | 22.5                            | 51306                          |
| ISS_JPL_5632_S4_L005  | 1.9                    | 82.4              | 40.4                            | 38085                          |
| ISS_JPL_5633_S5_L005  | 2.5                    | 57.6              | 30.1                            | 1959                           |
| ISS_JPL_5635_S6_L005  | 2.6                    | 112.0             | 84.5                            | 24153                          |
| ISS_JPL_5640_S8_L005  | 2.7                    | 88.5              | 58.4                            | 29537                          |
| ISS_JPL_5644_S12_L006 | 2.6                    | 62.6              | 40.6                            | 3170                           |
| ISS_JPL_5647_S14_L006 | 3.5                    | 77.5              | 64.9                            | 9487                           |
| ISS_JPL_5806_S15_L006 | 4.1                    | 71.0              | 66.7                            | 31164                          |
| ISS_JPL_5808_S16_L006 | 3.4                    | 128.2             | 55.8                            | 53142                          |

|                       |     |      |      |        |
|-----------------------|-----|------|------|--------|
| ISS_JPL_5810_S18_L006 | 3.2 | 11.8 | 10.8 | 179991 |
| ISS_JPL_5813_S20_L006 | 2.6 | 53.6 | 16.1 | 17216  |
| ISS_JPL_5818_S23_L007 | 3.4 | 54.2 | 52.9 | 86659  |
| ISS_JPL_5819_S24_L007 | 2.6 | 64.8 | 40.0 | 3059   |
| ISS_JPL_5820_S25_L007 | 2.8 | 11.4 | 10.8 | 62007  |
| ISS_JPL_5822_S26_L007 | 2.1 | 29.0 | 18.9 | 41732  |
| ISS_JPL_IIIF1SWP      | 1.0 | 7.3  | 5.4  | 132556 |
| ISS_JPL_IIIF1SW       | 1.5 | 9.1  | 6.1  | 225749 |
| ISS_JPL_IIIF2SWP      | 4.2 | 53.7 | 37.0 | 3007   |
| ISS_JPL_IIIF2SW       | 2.1 | 36.0 | 10.2 | 1910   |
| ISS_JPL_IIIF3SWP      | 2.7 | 14.4 | 7.5  | 168978 |
| ISS_JPL_IIIF3SW       | 2.4 | 14.1 | 7.4  | 168987 |
| ISS_JPL_IIIF4SWP      | 2.3 | 5.1  | 5.0  | 552627 |
| ISS_JPL_IIIF4SW       | 2.4 | 5.8  | 5.1  | 405632 |
| ISS_JPL_IIIF5SWP      | 2.9 | 5.1  | 4.9  | 205914 |
| ISS_JPL_IIIF5SW       | 2.4 | 5.5  | 4.9  | 375929 |
| ISS_JPL_IIIF7SWP      | 2.0 | 10.5 | 10.0 | 61535  |
| ISS_JPL_IIIF7SW       | 1.8 | 11.4 | 10.0 | 59237  |
| ISS_JPL_IIIF8SWP      | 3.0 | 6.2  | 5.0  | 248062 |
| ISS_JPL_IIIF8SW       | 2.8 | 7.0  | 5.0  | 274906 |

445

446

447

#### **Additional Supplementary Files**

448

449

450 **File S1 | Phylogenetic tree for placement of ISS genomes based on 16 ribosomal**  
451 **proteins.**

452

453

FileS1\_ISS\_PhyloTree.tree
